# Supplementary material
Source: HighWire-hosted journal article supplement (https://www.cmajopen.ca/highwire/filestream/81154/field_highwire_adjunct_files/0/2018-0143-1-at.pdf)
Supplement: 2018-0143-1-at.pdf [file 2018-0143-1-at.pdf]

## Appendix 1 (as supplied by the authors): Self-administered questionnaire and description of scalability assessment criteria

### One-page self-administered questionnaire

Name of the team and nominated principal investigator \_\_\_\_\_

Name and abbreviation of the evidence-based Innovation (EBI\*) \_\_\_\_\_

Type of the evidence-based Innovation (EBI\*) \_\_\_\_\_

Aim of the evidence-based Innovation (EBI\*) \_\_\_\_\_

\*We define EBI as a program, model, approach, tool, instrument, indicator, algorithm, service, idea, policy, practice whose evidence base has been established.

| Dimensions      | Items                                                                                                                                                                                                               | Yes                      | No                       | UE                       | NP                       | NA <sup>+</sup>          | Comment        |
|-----------------|---------------------------------------------------------------------------------------------------------------------------------------------------------------------------------------------------------------------|--------------------------|--------------------------|--------------------------|--------------------------|--------------------------|----------------|
| <b>Theory</b>   | Did a theory or conceptual model(s) inform the development of the EBI?                                                                                                                                              | <input type="checkbox"/> | <input type="checkbox"/> | <input type="checkbox"/> | <input type="checkbox"/> | <input type="checkbox"/> |                |
| <b>Impact</b>   | Do you have data on the acceptability of the EBI?                                                                                                                                                                   | <input type="checkbox"/> | <input type="checkbox"/> | <input type="checkbox"/> | <input type="checkbox"/> | <input type="checkbox"/> |                |
|                 | Do you have data on the feasibility of the EBI?                                                                                                                                                                     | <input type="checkbox"/> | <input type="checkbox"/> | <input type="checkbox"/> | <input type="checkbox"/> | <input type="checkbox"/> |                |
|                 | Do you have data on the adaptability of the EBI?                                                                                                                                                                    | <input type="checkbox"/> | <input type="checkbox"/> | <input type="checkbox"/> | <input type="checkbox"/> | <input type="checkbox"/> |                |
|                 | Do you have data on the efficacy of the EBI (i.e., testing under optimal conditions)?                                                                                                                               | <input type="checkbox"/> | <input type="checkbox"/> | <input type="checkbox"/> | <input type="checkbox"/> | <input type="checkbox"/> |                |
|                 | Do you have data on the effectiveness of the EBI (i.e., testing in real-world conditions)?                                                                                                                          | <input type="checkbox"/> | <input type="checkbox"/> | <input type="checkbox"/> | <input type="checkbox"/> | <input type="checkbox"/> |                |
|                 | Have the results of the testing of the EBI been documented?                                                                                                                                                         | <input type="checkbox"/> | <input type="checkbox"/> | <input type="checkbox"/> | <input type="checkbox"/> | <input type="checkbox"/> |                |
| <b>Coverage</b> |                                                                                                                                                                                                                     | <b>Yes</b>               | <b>No</b>                | <b>UE</b>                | <b>NP</b>                | <b>NA<sup>+</sup></b>    | <b>Comment</b> |
|                 | Do you have a measure of the reach of the EBI (numerator & denominator)?                                                                                                                                            | <input type="checkbox"/> | <input type="checkbox"/> | <input type="checkbox"/> | <input type="checkbox"/> | <input type="checkbox"/> |                |
|                 | Do you have a measure of the adoption of the EBI (numerator & denominator)?                                                                                                                                         | <input type="checkbox"/> | <input type="checkbox"/> | <input type="checkbox"/> | <input type="checkbox"/> | <input type="checkbox"/> |                |
|                 | Do you have data on the fidelity of the implementation/use of the EBI?                                                                                                                                              | <input type="checkbox"/> | <input type="checkbox"/> | <input type="checkbox"/> | <input type="checkbox"/> | <input type="checkbox"/> |                |
|                 | Do you have data on the maintenance of the EBI? If yes for how long (please specify)?                                                                                                                               | <input type="checkbox"/> | <input type="checkbox"/> | <input type="checkbox"/> | <input type="checkbox"/> | <input type="checkbox"/> |                |
| <b>Setting</b>  |                                                                                                                                                                                                                     | <b>Yes</b>               | <b>No</b>                | <b>UE</b>                | <b>NP</b>                | <b>NA<sup>+</sup></b>    | <b>Comment</b> |
|                 | Did you implement the EBI in a setting (e.g., at individual, community, cultural, political, workforce or organizational levels) comparable to that of the new setting to which it will be scaled up and/or spread? | <input type="checkbox"/> | <input type="checkbox"/> | <input type="checkbox"/> | <input type="checkbox"/> | <input type="checkbox"/> |                |
|                 | Did you assess if the EBI is compatible with similar interventions in the same setting?                                                                                                                             | <input type="checkbox"/> | <input type="checkbox"/> | <input type="checkbox"/> | <input type="checkbox"/> | <input type="checkbox"/> |                |
|                 | Did you determine if the EBI is consistent with policy directives?                                                                                                                                                  | <input type="checkbox"/> | <input type="checkbox"/> | <input type="checkbox"/> | <input type="checkbox"/> | <input type="checkbox"/> |                |
| <b>Cost</b>     |                                                                                                                                                                                                                     | <b>Yes</b>               | <b>No</b>                | <b>UE</b>                | <b>NP</b>                | <b>NA<sup>+</sup></b>    | <b>Comment</b> |
|                 | Do you have data on the cost-effectiveness of the EBI (compared to existing equivalent EBIs or alternatives)?                                                                                                       | <input type="checkbox"/> | <input type="checkbox"/> | <input type="checkbox"/> | <input type="checkbox"/> | <input type="checkbox"/> |                |
|                 | Do you have data on potential financial and staff resources needed to scale up and/or spread the EBI?                                                                                                               | <input type="checkbox"/> | <input type="checkbox"/> | <input type="checkbox"/> | <input type="checkbox"/> | <input type="checkbox"/> |                |

**Abbreviations:** *EBI*, Evidence-Based Innovation; *UE*, Under Evaluation; *NP*, Not Planned (or not evaluated); *NA*, Not Applicable (\* please specify why NA).

**Definitions:** *Reach*: proportion (numerator and denominator) of target population experiencing the EBI; *Adoption*: proportion (numerator and denominator) of settings that will adopt the EBI; *Fidelity*: extent to which the EBI is implemented/used as intended; *Maintenance*: extent to which the EBI is sustained over time.

Please send this completed form to [kasra.hassani@ubc.ca](mailto:kasra.hassani@ubc.ca) by September 29<sup>th</sup> 2017. For questions, please contact Ali Ben Charif ([ali.ben-charif.1@ulaval.ca](mailto:ali.ben-charif.1@ulaval.ca)).

©Ben Charif A., Freitas A. & Légaré F.

August 2017

**Supplementary Table A1:** Description of scalability assessment criteria among 33 evidence-based innovations

| Assessment dimension                                                                                                                                                       | Criterion                                                                             | Number of evidence-based innovations (% row) |                   |                          | Number of evidence-based innovations met criteria per dimension: mean <sup>3</sup> (SD) |
|----------------------------------------------------------------------------------------------------------------------------------------------------------------------------|---------------------------------------------------------------------------------------|----------------------------------------------|-------------------|--------------------------|-----------------------------------------------------------------------------------------|
|                                                                                                                                                                            |                                                                                       | Criterion met                                | Criterion not met | Criterion not applicable |                                                                                         |
| Use of theory (1 criterion)                                                                                                                                                | Evidence-based innovations developed with theory <sup>1</sup>                         | 29 (87.9)                                    | 2 (6.1)           | 2 (6.1)                  | Not applicable                                                                          |
| Impact assessments (6 criteria)                                                                                                                                            | Acceptability                                                                         | 22 (66.7)                                    | 4 (12.1)          | 7 (21.2)                 | 22.3 (5.6)                                                                              |
|                                                                                                                                                                            | Feasibility                                                                           | 26 (78.8)                                    | 3 (9.1)           | 4 (12.1)                 |                                                                                         |
|                                                                                                                                                                            | Adaptability                                                                          | 19 (57.6)                                    | 8 (24.2)          | 6 (18.2)                 |                                                                                         |
|                                                                                                                                                                            | Efficacy <sup>2</sup>                                                                 | 13 (39.4)                                    | 10 (30.3)         | 9 (27.3)                 |                                                                                         |
|                                                                                                                                                                            | Effectiveness                                                                         | 27 (81.8)                                    | 2 (6.1)           | 4 (12.1)                 |                                                                                         |
|                                                                                                                                                                            | Results documented                                                                    | 27 (81.8)                                    | 4 (12.1)          | 2 (6.1)                  |                                                                                         |
| Setting assessments (3 criteria)                                                                                                                                           | Implemented in setting comparable to target setting <sup>1</sup>                      | 28 (84.8)                                    | 1 (3.0)           | 4 (12.1)                 | 21.7 (8.5)                                                                              |
|                                                                                                                                                                            | Compatibility with similar evidence-based innovations in target settings <sup>2</sup> | 12 (36.4)                                    | 13 (39.4)         | 7 (21.2)                 |                                                                                         |
|                                                                                                                                                                            | Consistency with policy directives                                                    | 25 (75.8)                                    | 0                 | 8 (24.2)                 |                                                                                         |
| Cost assessments (2 criteria)                                                                                                                                              | Cost-effectiveness                                                                    | 16 (48.5)                                    | 10 (30.3)         | 7 (21.2)                 | 17.5 (2.1)                                                                              |
|                                                                                                                                                                            | Resources needed for the scale-up (affordability)                                     | 19 (57.6)                                    | 10 (30.3)         | 4 (12.1)                 |                                                                                         |
| Coverage assessments (4 criteria)                                                                                                                                          | Reach (numerator & denominator)                                                       | 14 (42.4)                                    | 7 (21.2)          | 12 (36.4)                | 14.0 (4.1)                                                                              |
|                                                                                                                                                                            | Adoption (numerator & denominator) <sup>1</sup>                                       | 9 (27.3)                                     | 12 (36.4)         | 12 (36.4)                |                                                                                         |
|                                                                                                                                                                            | Fidelity                                                                              | 19 (57.6)                                    | 4 (12.1)          | 10 (30.3)                |                                                                                         |
|                                                                                                                                                                            | Maintenance <sup>1,2</sup>                                                            | 14 (42.4)                                    | 4 (12.1)          | 14 (42.4)                |                                                                                         |
| <b>Abbreviations:</b> SD, standard deviation                                                                                                                               |                                                                                       |                                              |                   |                          |                                                                                         |
| <sup>1</sup> Due to rounding error, percentages may not add up to 100%                                                                                                     |                                                                                       |                                              |                   |                          |                                                                                         |
| <sup>2</sup> Information about the assessment criteria was not provided for one evidence-based innovation (i.e., missing value: n=1, 3.0%)                                 |                                                                                       |                                              |                   |                          |                                                                                         |
| <sup>3</sup> Mean = sum of the number of evidence-based innovations (n) that met the criteria in each dimension divided by the total number of criteria in that dimension. |                                                                                       |                                              |                   |                          |                                                                                         |
